# Supplementary material
Source: HighWire-hosted journal article supplement (https://neurologyopen.bmj.com/content/4/2/e000321)
Supplement: inline-supplementary-material-1 [file inline-supplementary-material-1.pdf]

Supplementary Table 1. Baseline characteristics of each clinical category

|                        | Whole      | CU        | MCI        | ADD        |
|------------------------|------------|-----------|------------|------------|
| Number (%)             | 194 (100)  | 53 (27.3) | 86 (44.3)  | 55 (28.4)  |
| Age, years (IQR)       | 71 (5)     | 67 (3)    | 73 (7)     | 74 (6)     |
| Female, n (%)          | 99 (51.0)  | 28 (52.8) | 41 (47.7)  | 30 (54.5)  |
| Education, years (IQR) | 13 (1)     | 14 (2)    | 13 (1)     | 12 (2)     |
| APOE ε4 allele (%)     |            |           |            |            |
| 0                      | 101 (52.1) | 41 (77.4) | 44 (51.2)  | 16 (29.1)  |
| 1                      | 74 (38.1)  | 12 (22.6) | 35 (40.7)  | 27 (49.1)  |
| 2                      | 19 (9.8)   | 0 (0)     | 7 (8.1)    | 12 (21.8)  |
| MMSE (IQR)             | 27 (3)     | 30 (1)    | 27 (2)     | 23 (2)     |
| ADAS-Cog (IQR)         | 18.8 (8.8) | 6.7 (2)   | 20.0 (5.2) | 26.7 (3.6) |
| CDR-SB (IQR)           | 2 (1)      | 0 (0)     | 2 (1)      | 4 (1)      |
| FAQ (IQR)              | 3 (3)      | 0 (0)     | 3 (2)      | 9 (3)      |
| Aβ PET, n (%)          |            |           |            |            |
| Negative               | 47 (47.0)  | 31 (88.6) | 15 (35.7)  | 1 (4.3)    |
| Positive               | 53 (53.0)  | 4 (11.4)  | 27 (64.3)  | 22 (95.7)  |

Numbers are median (interquartile range, IQR) for continuous variables and raw number (percentage) for categorical variables.

Abbreviations: Aβ, β-amyloid; ADAS-Cog, Alzheimer’s Disease Assessment Scale-Cognitive Subscale; ADD, Alzheimer’s disease dementia; CDR-SB, sum of boxes of the Clinical Dementia Rating; CU, cognitively unimpaired subjects; FAQ, Functional Assessment Questionnaire; MMSE, Mini–Mental State Examination; MCI, mild cognitive impairment

Supplementary Table 2. Baseline characteristics of 3 groups

| AT(N) <sub>tau</sub>   | Normal biomarkers | Non-AD pathologic changes | AD continuum    | p-value | AT(N) <sub>NL</sub>    | Normal biomarkers | Non-AD pathologic changes | AD continuum    | p-value |
|------------------------|-------------------|---------------------------|-----------------|---------|------------------------|-------------------|---------------------------|-----------------|---------|
| Number (%)             | 52 (29.4)         | 10 (5.6)                  | 115 (65.0)      |         | Number (%)             | 39 (20.1)         | 23 (5.6)                  | 115 (65.0)      |         |
| Age, years (IQR)       | 67 (9)            | 75 (4)                    | 73 (10)         | 0.005   | Age, years (IQR)       | 66 (8)            | 75 (9)                    | 73 (10)         | <.001   |
| Female, n (%)          | 23 (44.2)         | 5 (50.0)                  | 59 (51.3)       | 0.698   | Female, n (%)          | 18 (46.2)         | 10 (43.5)                 | 59 (51.3)       | 0.723   |
| Education, years (IQR) | 14 (4)            | 16 (0)                    | 13 (4)          | 0.015   | Education, years (IQR) | 14 (4)            | 16 (4)                    | 13 (4)          | 0.072   |
| APOE ε4 allele (%)     |                   |                           |                 | <.001   | APOE ε4 allele (%)     |                   |                           |                 | <.001   |
| 0                      | 49 (94.2)         | 7 (70.0)                  | 39 (33.9)       |         | 0                      | 37 (94.9)         | 19 (82.6)                 | 39 (33.9)       |         |
| 1                      | 3 (5.8)           | 3 (30.0)                  | 57 (49.6)       |         | 1                      | 2 (5.1)           | 4 (17.4)                  | 57 (49.6)       |         |
| 2                      | 0 (0)             | 0 (0)                     | 19 (16.5)       |         | 2                      | 0 (0)             | 0 (10.0)                  | 19 (16.5)       |         |
| Clinical status, n (%) |                   |                           |                 | <.001   | Clinical status, n (%) |                   |                           |                 | <.001   |
| CU                     | 31 (59.6)         | 4 (40.0)                  | 11 (9.6)        |         | CU                     | 27 (69.2)         | 8 (34.8)                  | 11 (9.6)        |         |
| MCI                    | 21 (40.4)         | 5 (50.0)                  | 56 (48.7)       |         | MCI                    | 12 (30.8)         | 14 (60.9)                 | 56 (48.7)       |         |
| ADD                    | 0 (0)             | 1 (10.0)                  | 48 (41.7)       |         | ADD                    | 0 (0)             | 1 (4.3)                   | 48 (41.7)       |         |
| MMSE (IQR)             | 29 (2)            | 27 (5)                    | 25 (4)          | <.001   | MMSE (IQR)             | 29 (2)            | 27 (5)                    | 25 (4)          | <.001   |
| ADAS-Cog (IQR)         | 9.4 (9.1)         | 18.7 (15.9)               | 23.0 (10.0)     | <.001   | ADAS-Cog (IQR)         | 8.3 (7.5)         | 14.3 (14.7)               | 23.0 (10.0)     | <.001   |
| CDR-SB (IQR)           | 0 (0.5)           | 0.8 (2.8)                 | 2.0 (2.5)       | <.001   | CDR-SB (IQR)           | 0 (0.5)           | 1.0 (1.0)                 | 2.0 (2.5)       | <.001   |
| FAQ (IQR)              | 0 (0)             | 3 (9)                     | 5 (8)           | <.001   | FAQ (IQR)              | 0 (0)             | 1 (3)                     | 5 (8)           | <.001   |
| Aβ PET, n (%)          |                   |                           |                 | <.001   | Aβ PET, n (%)          |                   |                           |                 | <.001   |
| Negative               | 34 (100)          | 3 (50.0)                  | 5 (10.4)        |         | Negative               | 25 (100)          | 12 (0)                    | 5 (10.4)        |         |
| Positive               | 0 (0)             | 3 (50.0)                  | 43 (89.6)       |         | Positive               | 0 (0)             | 3 (100)                   | 43 (89.6)       |         |
| BL Aβ42, pg/mL (IQR)   | 485.2 (101.7)     | 486.3 (185.4)             | 240.1 (70.1)    | <.001   | BL Aβ42, pg/mL (IQR)   | 479.7 (84.3)      | 504.8 (152.3)             | 240.1 (70.1)    | <.001   |
| BL p-tau, pg/mL (IQR)  | 19.2 (4.5)        | 33.8 (7.9)                | 36.0 (23.5)     | <.001   | BL p-tau, pg/mL (IQR)  | 19.2 (4.1)        | 24.2 (13.5)               | 36.0 (23.5)     | <.001   |
| BL t-tau, pg/mL (IQR)  | 58.4 (29.6)       | 122.8 (57.5)              | 119.3 (66.3)    | <.001   | BL t-tau, pg/mL (IQR)  | 54.6 (24.4)       | 87.6 (37.5)               | 119.3 (66.3)    | <.001   |
| BL NFL, pg/mL (IQR)    | 2421.6 (1344.70)  | 3603.7 (2454.6)           | 3259.0 (1238.7) | <.001   | BL NFL, pg/mL (IQR)    | 2106.9 (1118.0)   | 4028.7 (1598.2)           | 3259.0 (1238.7) | <.001   |

Numbers are median (interquartile range, IQR) for continuous variables and raw number (percentage) for categorical variables.

Differences in baseline characteristics of participants across 8 AT(N) profiles were first assessed using Kruskal-Wallis rank sum test for continuous variables, or a Chi-squared test for

categorical variables.

Abbreviations: A $\beta$ ,  $\beta$ -amyloid; ADAS-Cog, Alzheimer's Disease Assessment Scale-Cognitive Subscale; ADD, Alzheimer's disease dementia; BL, baseline; CDR-SB, sum of boxes of the Clinical Dementia Rating; CU, cognitively unimpaired subjects; FAQ, Functional Assessment Questionnaire; MMSE, Mini-Mental State Examination; MCI, mild cognitive impairment; NfL, neurofilament light chain; p-tau181, tau phosphorylated at threonine 181; t-tau, total tau

Supplementary Table 3. Longitudinal changes of biomarkers

| AT(N) <sub>tau</sub> | Aβ42      |         | p-tau181     |         | t-tau     |         | NfL       |         |
|----------------------|-----------|---------|--------------|---------|-----------|---------|-----------|---------|
|                      | slope (β) | p-value | slope (β)    | p-value | slope (β) | p-value | slope (β) | p-value |
| A-T-(N)-             | 0.005     | 0.601   | <b>0.014</b> | 0.039   | 0.001     | 0.801   | 0.003     | 0.435   |
| A-T-(N)+             | NA        | NA      | NA           | NA      | NA        | NA      | NA        | NA      |
| A-T+(N)-             | -0.015    | 0.692   | -0.040       | 0.279   | -0.005    | 0.467   | 0.001     | 0.660   |
| A-T+(N)+             | NA        | NA      | NA           | NA      | NA        | NA      | NA        | NA      |
| A+T-(N)-             | 0.005     | 0.712   | <b>0.034</b> | 0.006   | 0.006     | 0.520   | 0.004     | 0.467   |
| A+T-(N)+             | 0.013     | 0.473   | 0.106        | 0.117   | 0.013     | 0.216   | 0.216     | 0.455   |
| A+T+(N)-             | 0.002     | 0.941   | -0.024       | 0.420   | 0.020     | 0.393   | 0.103     | 0.304   |
| A+T+(N)+             | 0.002     | 0.785   | 0.009        | 0.639   | 0.006     | 0.728   | 0.009     | 0.068   |

| AT(N) <sub>NfL</sub> | Aβ42      |         | p-tau181     |         | t-tau     |         | NfL       |         |
|----------------------|-----------|---------|--------------|---------|-----------|---------|-----------|---------|
|                      | slope (β) | p-value | slope (β)    | p-value | slope (β) | p-value | slope (β) | p-value |
| A-T-(N)-             | 0.005     | 0.621   | <b>0.015</b> | 0.041   | 0.001     | 0.825   | 0.001     | 0.620   |
| A-T-(N)+             | 0.006     | 0.810   | 0.008        | 0.595   | 0.001     | 0.953   | 0.013     | 0.336   |
| A-T+(N)-             | -0.001    | 0.956   | -0.025       | 0.437   | 0.007     | 0.400   | 0.005     | 0.234   |
| A-T+(N)+             | NA        | NA      | NA           | NA      | NA        | NA      | NA        | NA      |
| A+T-(N)-             | 0.014     | 0.496   | 0.028        | 0.088   | 0.002     | 0.869   | 0.000     | 0.898   |
| A+T-(N)+             | -0.002    | 0.848   | <b>0.057</b> | 0.015   | 0.011     | 0.645   | 0.062     | 0.504   |
| A+T+(N)-             | 0.003     | 0.742   | 0.001        | 0.945   | 0.007     | 0.603   | 0.033     | 0.244   |
| A+T+(N)+             | 0.001     | 0.959   | 0.007        | 0.802   | 0.010     | 0.738   | 0.012     | 0.124   |

Each statistic was calculated by liner regression model, adjusting age, sex, and education years. **Bold** indicated that the results were statistically significant. The slopes and *p*-values represent differences between each AT(N) profile slope relative to zero. The statistics of AT(N) profiles with a small sample size (< 3 samples who were measured the CSF biomarkers at baseline and 12 months) were not calculated and were represented as “NA”.

Supplementary Table 4. Prevalence of AT(N) profiles and biological AD according to CSF biomarkers across cohorts

| Report                                                           | Cohort                           | N marker | Clinical Status (number) | Mean Age | A-T- (N)- | A-T- (N)+ | A-T+ (N)- | A-T+ (N)+ | A+ T- (N)- | A+ T- (N)+ | A+ T+ (N)- | A+ T+ (N)+ | Biological AD (A+T+) |
|------------------------------------------------------------------|----------------------------------|----------|--------------------------|----------|-----------|-----------|-----------|-----------|------------|------------|------------|------------|----------------------|
| Kern S, et al. <i>Neurology</i> 2018 <sup>1</sup>                | H70 Gothenburg                   | t-tau    | CU (259)                 | 70.6     | 54        | 19        | 0         | 5         | 13         | 7          | 0          | 2          | 2                    |
| Ekman U, et al. <i>Sci Rep</i> 2018 <sup>2</sup>                 | ADNI                             | t-tau    | CU (101)                 | 75.5     | 42        | 2         | 10        | 7         | 18         | 0          | 9          | 12         | 21                   |
|                                                                  |                                  |          | stable MCI (80)          | 74.5     | 30        | 0         | 6         | 5         | 11         | 0          | 19         | 29         | 48                   |
|                                                                  |                                  |          | progressive MCI (74)     | 74.5     | 8         | 0         | 2         | 0         | 5          | 2          | 30         | 54         | 84                   |
|                                                                  |                                  |          | AD (102)                 | 75.0     | 4         | 0         | 2         | 2         | 10         | 0          | 19         | 63         | 82                   |
| Soldan A, et al. <i>Neurology</i> 2019 <sup>3</sup>              | ACS, AIBL, BIOCARD, IMPACT, WRAP | t-tau    | CU (814)                 | 59.6     | 39        | 6         | 6         | 17        | 19         | 2          | 2          | 9          | 11                   |
| Carandini T, et al. <i>Alzheimers Res Ther</i> 2019 <sup>4</sup> | Univ. of Milan                   | t-tau    | CU (9)                   | 69       | 78        | 0         | 0         | 0         | 22         | 0          | 0          | 0          | 0                    |
|                                                                  |                                  |          | MCI (132)                | 73       | 20        | 0         | 8         | 9         | 27         | 3          | 14         | 19         | 33                   |
|                                                                  |                                  |          | AD (229)                 | 72       | 0         | 0         | 2         | 3         | 25         | 3          | 15         | 52         | 67                   |
| Mattsson-Carlgren N, et al. <i>Neurology</i> 2020 <sup>5</sup>   | BioFINDER-1                      | NfL      | CU (53)                  | 74.5     | 40        | 4         | 4         | 2         | 25         | 8          | 17         | 0          | 17                   |
|                                                                  |                                  |          | MCI (14), AD (34)        | 71.9     | 2         | 0         | 2         | 0         | 10         | 0          | 59         | 27         | 86                   |
|                                                                  | BioFINDER-2                      |          | CU (245)                 | 63.6     | 49        | 1         | 13        | 2         | 17         | 0          | 14         | 3          | 17                   |
|                                                                  |                                  |          | MCI (138), AD (6)        | 70.9     | 25        | 8         | 8         | 1         | 17         | 3          | 25         | 14         | 39                   |
| Lee J, et al. <i>J Korean Med Sci</i> 2020 <sup>6</sup>          | Samsung Medical Center           | t-tau    | CU (51)                  | 64.1     | 73        | 0         | 14        | 2         | 8          | 2          | 2          | 0          | 2                    |
|                                                                  |                                  |          | Amnestic MCI (23)        | 67.5     | 4         | 4         | 9         | 0         | 30         | 22         | 4          | 26         | 30                   |
|                                                                  |                                  |          | AD (65)                  | 63.3     | 2         | 0         | 0         | 2         | 26         | 14         | 0          | 57         | 57                   |
| Grontvedt GR, et al.                                             | Univ. Hospital of                | t-tau    | CU (61)                  | 68       | 69        | 0         | 10        | 13        | 2          | 0          | 0          | 7          | 7                    |

|                                                                        |                      |       |                        |      |    |    |   |    |    |    |    |    |    |
|------------------------------------------------------------------------|----------------------|-------|------------------------|------|----|----|---|----|----|----|----|----|----|
| <i>J Alzheimers Dis</i> 2020 <sup>7</sup>                              | Trondheim            |       | Amnestic MCI (64)      | 64   | 23 | 3  | 2 | 9  | 17 | 3  | 3  | 39 | 42 |
|                                                                        |                      |       | AD (38)                | 63.5 | 3  | 3  | 0 | 5  | 18 | 3  | 0  | 68 | 68 |
| Cousins KAQ, et al. <i>Brain</i> 2021 <sup>8</sup>                     | U-Penn (Autopsy)     | t-tau | Amnestic AD (98)       | 73.5 | 2  | 0  | 2 | 3  | 13 | 11 | 16 | 52 | 68 |
|                                                                        |                      |       | Non-amnestic AD (20)   | 63.5 | 15 | 0  | 0 | 0  | 30 | 10 | 25 | 20 | 45 |
|                                                                        |                      |       | Amnestic FTLD (5)      | 71.0 | 40 | 0  | 0 | 0  | 40 | 20 | 0  | 0  | 0  |
|                                                                        |                      |       | Non-amnestic FTLD (59) | 65.0 | 64 | 12 | 3 | 5  | 12 | 3  | 0  | 0  | 0  |
|                                                                        |                      |       |                        |      |    |    |   |    |    |    |    |    |    |
| Eckerstrom C, et al. <i>Alzheimers Dement (Amst)</i> 2021 <sup>9</sup> | Gothenburg MCI study | t-tau | SCI (194), MCI (226)   | NA   | 33 | 6  | 8 | 20 | 8  | 1  | 1  | 23 | 24 |
|                                                                        |                      |       | CU (46)                | 71.8 | 67 | 2  | 4 | 2  | 15 | 0  | 2  | 7  | 9  |
| This study                                                             | J-ADNI               | t-tau | MCI (82)               | 71.8 | 26 | 2  | 1 | 2  | 17 | 2  | 6  | 43 | 49 |
|                                                                        |                      |       | AD (49)                | 72.2 | 0  | 0  | 2 | 0  | 33 | 4  | 8  | 53 | 61 |
|                                                                        |                      |       | CU (46)                | 71.8 | 59 | 11 | 7 | 0  | 15 | 0  | 9  | 0  | 9  |
|                                                                        |                      | NfL   | MCI (82)               | 71.8 | 15 | 13 | 2 | 1  | 10 | 10 | 22 | 27 | 49 |
|                                                                        |                      |       | AD (49)                | 72.2 | 0  | 0  | 0 | 2  | 10 | 27 | 20 | 41 | 61 |

All cohorts use CSF Aβ42 as A maker and CSF p-tau181 as T marker. The number for each AT(N) profile and biological AD indicates percentage.

Abbreviations: AD, Alzheimer’s disease dementia; CU, cognitively unimpaired subjects; FTLD, frontotemporal lobar degeneration; MCI, mild cognitive impairment; NA, not applicable; SCI, subjective cognitive impairment

**References for supplementary Table 4**

1. Kern S, Zetterberg H, Kern J, et al. Prevalence of preclinical Alzheimer disease: Comparison of current classification systems. *Neurology* 2018;90(19):e1682-e91.
2. Ekman U, Ferreira D, Westman E. The A/T/N biomarker scheme and patterns of brain atrophy assessed in mild cognitive impairment. *Sci Rep* 2018;8(1):8431.
3. Soldan A, Pettigrew C, Fagan AM, et al. ATN profiles among cognitively normal individuals and longitudinal cognitive outcomes. *Neurology* 2019;92(14):e1567-e79.
4. Carandini T, Arighi A, Sacchi L, et al. Testing the 2018 NIA-AA research framework in a retrospective large cohort of patients with cognitive impairment: from biological biomarkers to clinical syndromes. *Alzheimers Res Ther* 2019;11(1):84.
5. Mattsson-Carlgrén N, Leuzy A, Janelidze S, et al. The implications of different approaches to define AT(N) in Alzheimer disease. *Neurology* 2020;94(21):e2233-e44.
6. Lee J, Jang H, Kang SH, et al. Cerebrospinal Fluid Biomarkers for the Diagnosis and Classification of Alzheimer's Disease Spectrum. *J Korean Med Sci* 2020;35(44):e361.
7. Grøntvedt GR, Lauridsen C, Berge G, et al. The Amyloid, Tau, and Neurodegeneration (A/T/N) Classification Applied to a Clinical Research Cohort with Long-Term Follow-Up. *J Alzheimers Dis* 2020;74(3):829-37.
8. Cousins KAQ, Phillips JS, Irwin DJ, et al. ATN incorporating cerebrospinal fluid neurofilament light chain detects frontotemporal lobar degeneration. *Alzheimers Dement* 2021;17(5):822-30.
9. Eckerström C, Svensson J, Kettunen P, et al. Evaluation of the ATN model in a longitudinal memory clinic sample with different underlying disorders. *Alzheimers Dement (Amst)* 2021;13(1):e12031.

## Supplementary figure 1

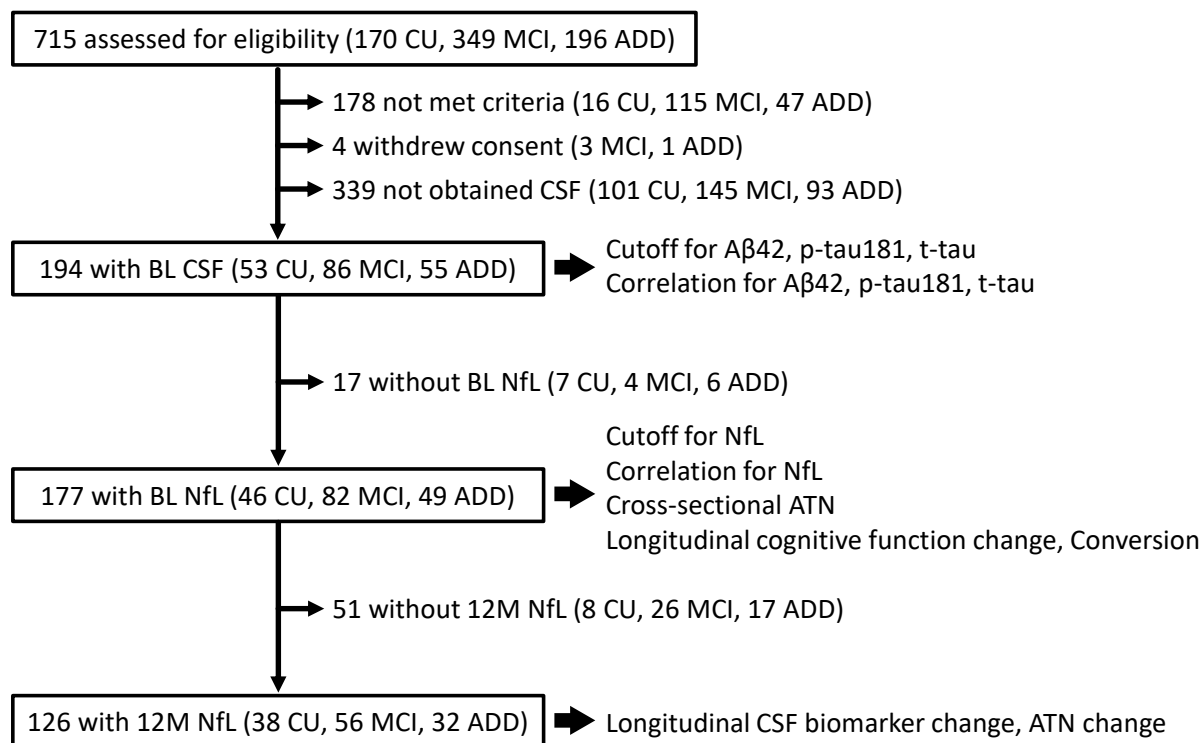

Supplementary Figure 1. Flowchart showing the number of participants used for each analysis



## Supplementary figure 2

A. A $\beta$ 42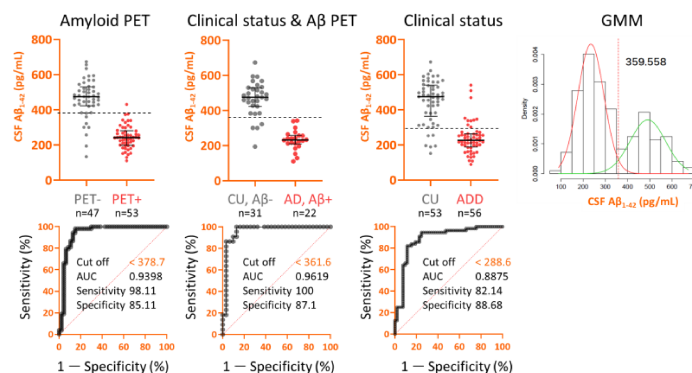

## B. p-tau181

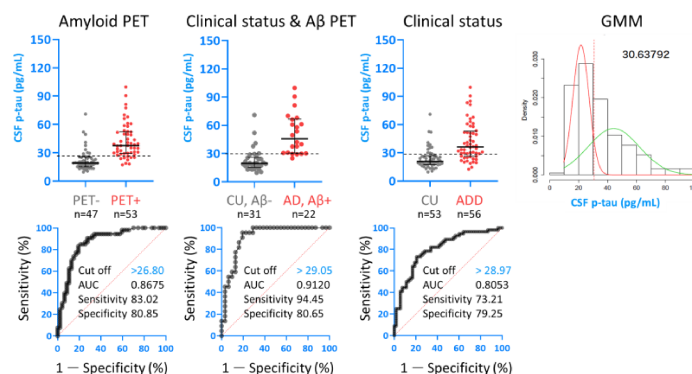

## C. t-tau

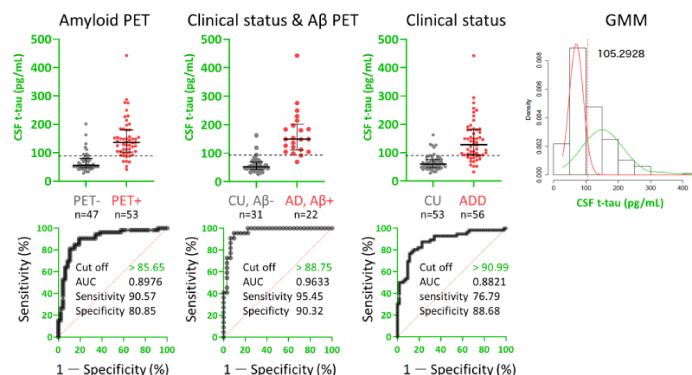

## D. NfL

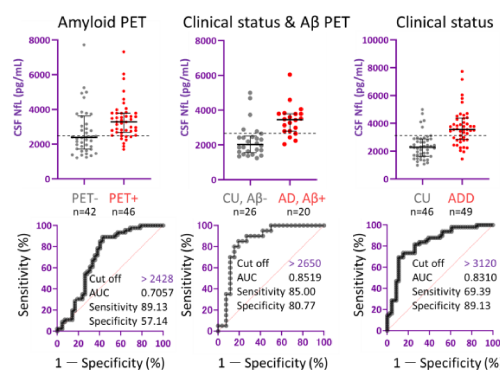

**Supplementary figure 2. Determination of cutoff values for each of the biomarkers by different methods**

In the first column, the cutoff value was determined between A $\beta$  PET negative (A $\beta$  PET–) and positive (A $\beta$  PET+) participants. In the second column, the cutoff value was determined between CU participants with A $\beta$  PET– (CU, A $\beta$ –) and ADD patients with A $\beta$  PET+ (AD, A $\beta$ –). In the third column, the cutoff value was determined between CU subjects and ADD participants. The fourth column shows the cutoff value by GMM (except NfL, which is not suitable because of the unimodal distribution). The dotted lines in upper panels in each biomarker represent the cutoff values calculated according to Youden's index. The lower panels in each biomarker show the ROC curves to determine the cutoff values. In GMM, the cutoff values are estimated as the crossing point (vertical lines) of the prevalence-weighted densities.

## Supplementary figure 3

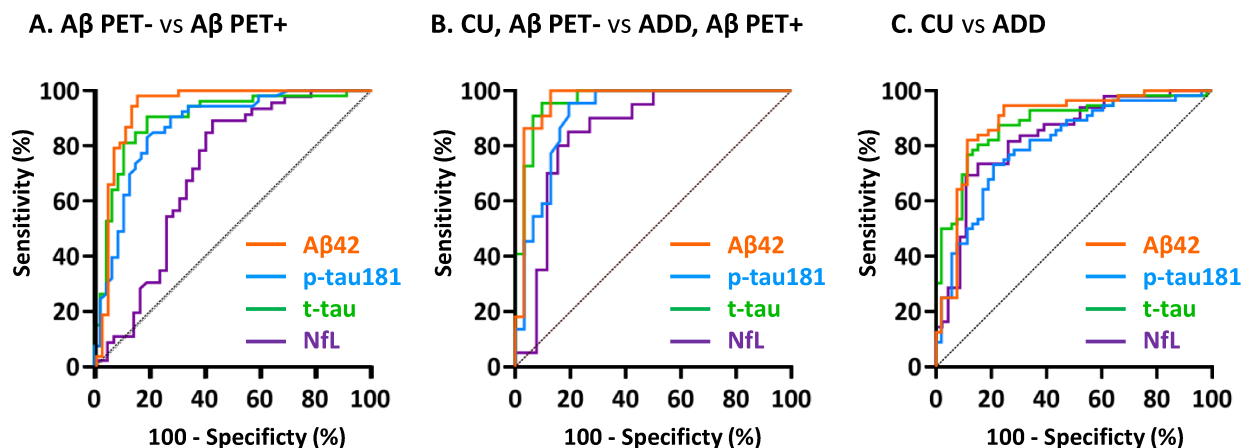

### Supplementary Figure 3. ROC curves of different CSF biomarkers

(A) ROC curves that distinguish Aβ PET negative (Aβ PET-) from PET-positive (Aβ PET+) participants are shown. (B) ROC curves that distinguish CU participants with Aβ PET- (CU, Aβ PET-) from ADD patients with Aβ PET+ (ADD, Aβ+) are shown. (C) ROC curves that distinguish CU participants from ADD patients.

## Supplementary figure 4

### A. Clinical status

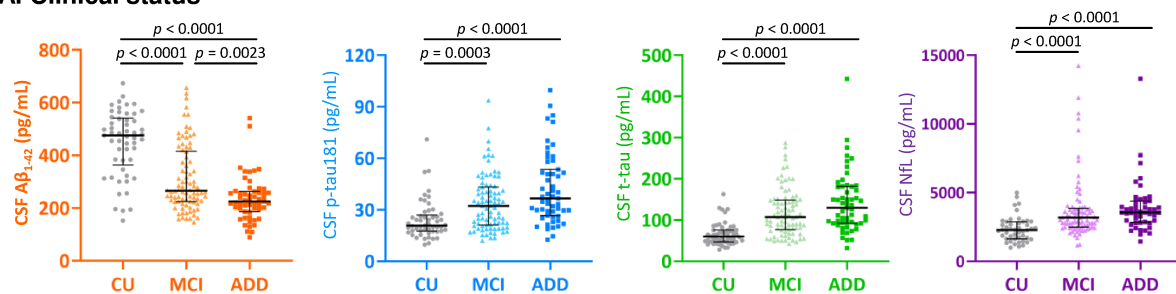

### B. Age

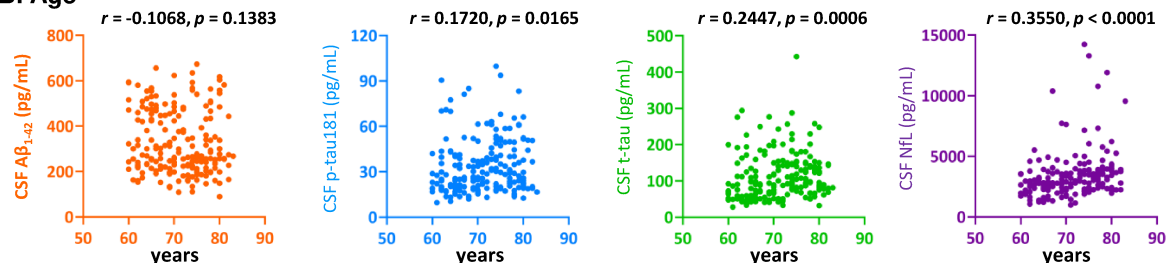

### C. Education

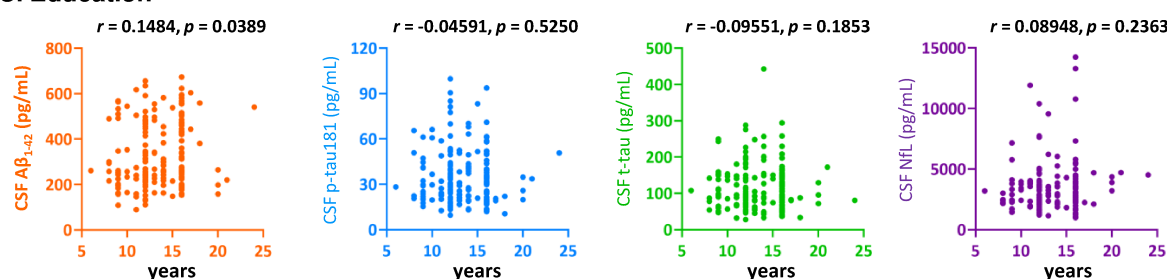

### D. Sex

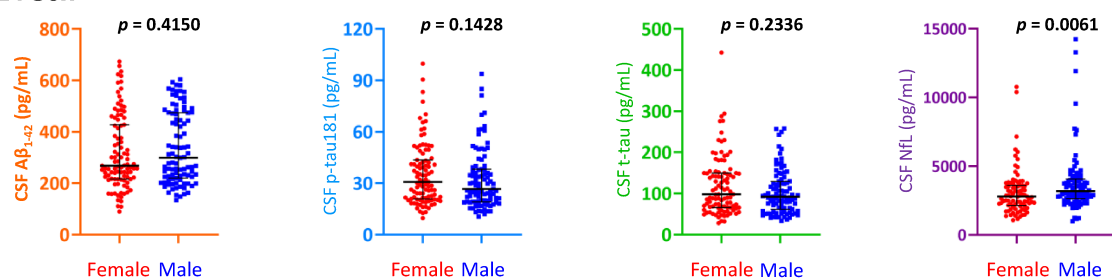

### E. APOE ε4 allele

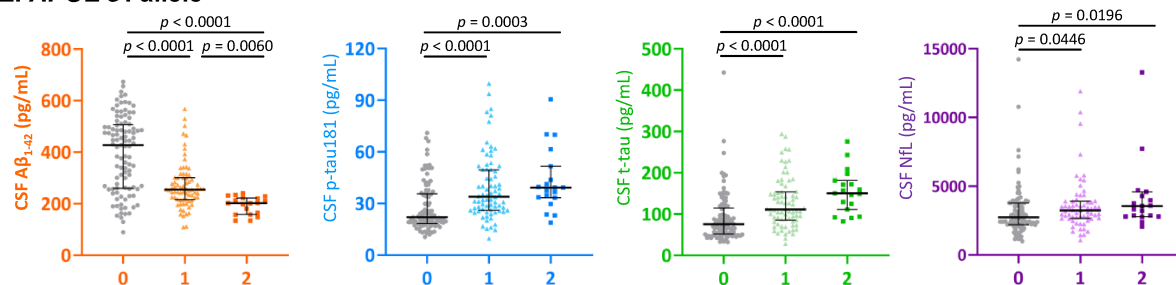

**Supplementary Figure 4. Analysis of various parameters by CSF biomarkers**

Parameters including clinical status (**A**), age (**B**), years of education (**C**), sex (**D**), and numbers of *APOE*  $\epsilon$ 4 allele (**E**) at baseline were analyzed by CSF biomarkers. Orange: A $\beta$ 42, blue: p-tau, green: t-tau, violet: NfL

Supplementary figure 5

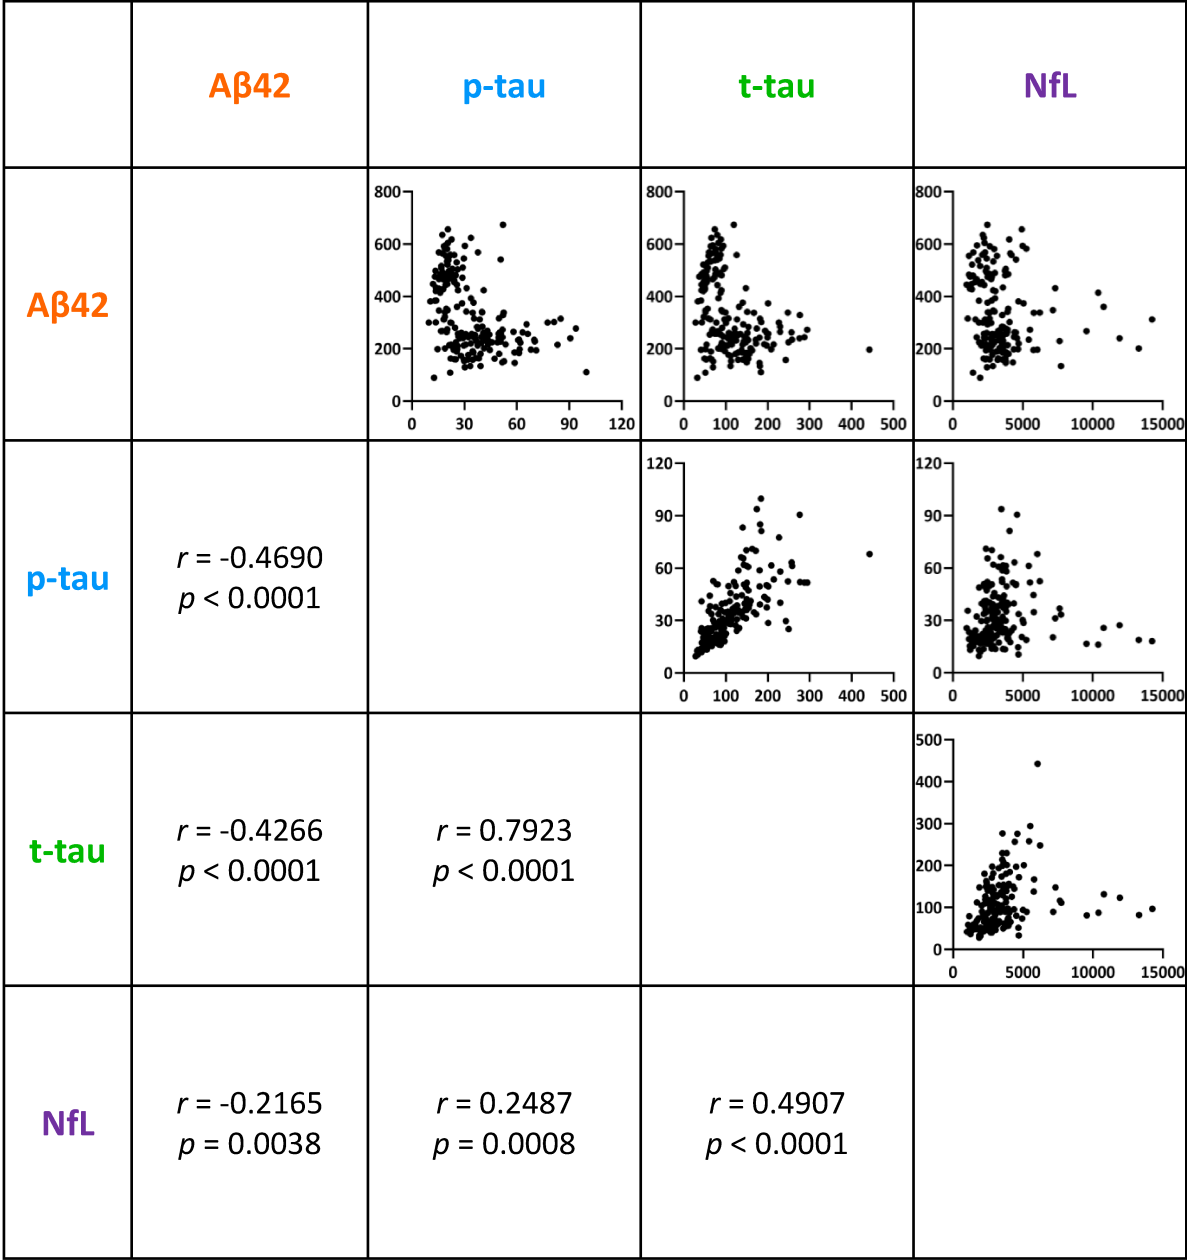

**Supplementary Figure 5. Correlations between different CSF biomarkers**  
Scatterplots (shown in upper diagonal) and correlation coefficients (shown in lower diagonal) are presented among CSF biomarkers including Aβ42, p-tau, total tau and NfL.

## Supplementary figure 6

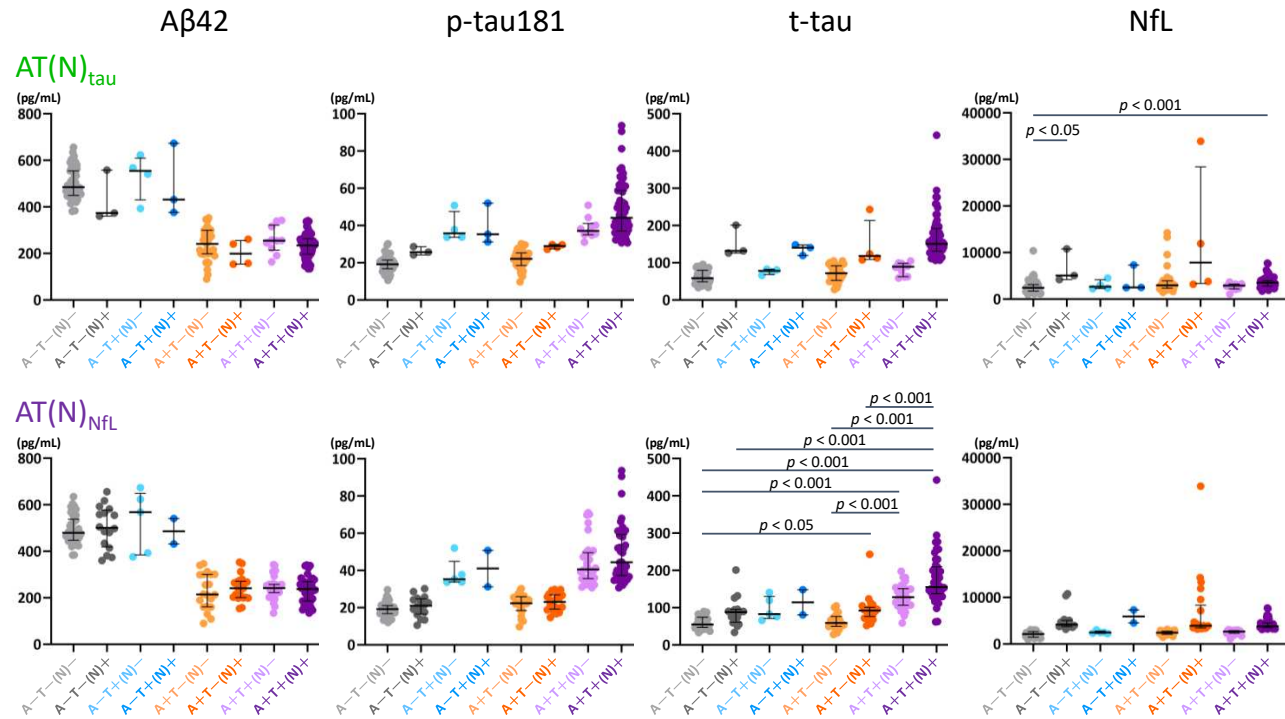**Supplementary Figure 6. CSF biomarker levels at baseline among 8 AT(N) profiles**

Upper panels show CSF biomarker levels of each of AT(N) groups stratified by AT(N)<sub>tau</sub> classification. Lower panels show CSF biomarker levels of each of AT(N) groups stratified by AT(N)<sub>NfL</sub> classification.

## Supplementary figure 7

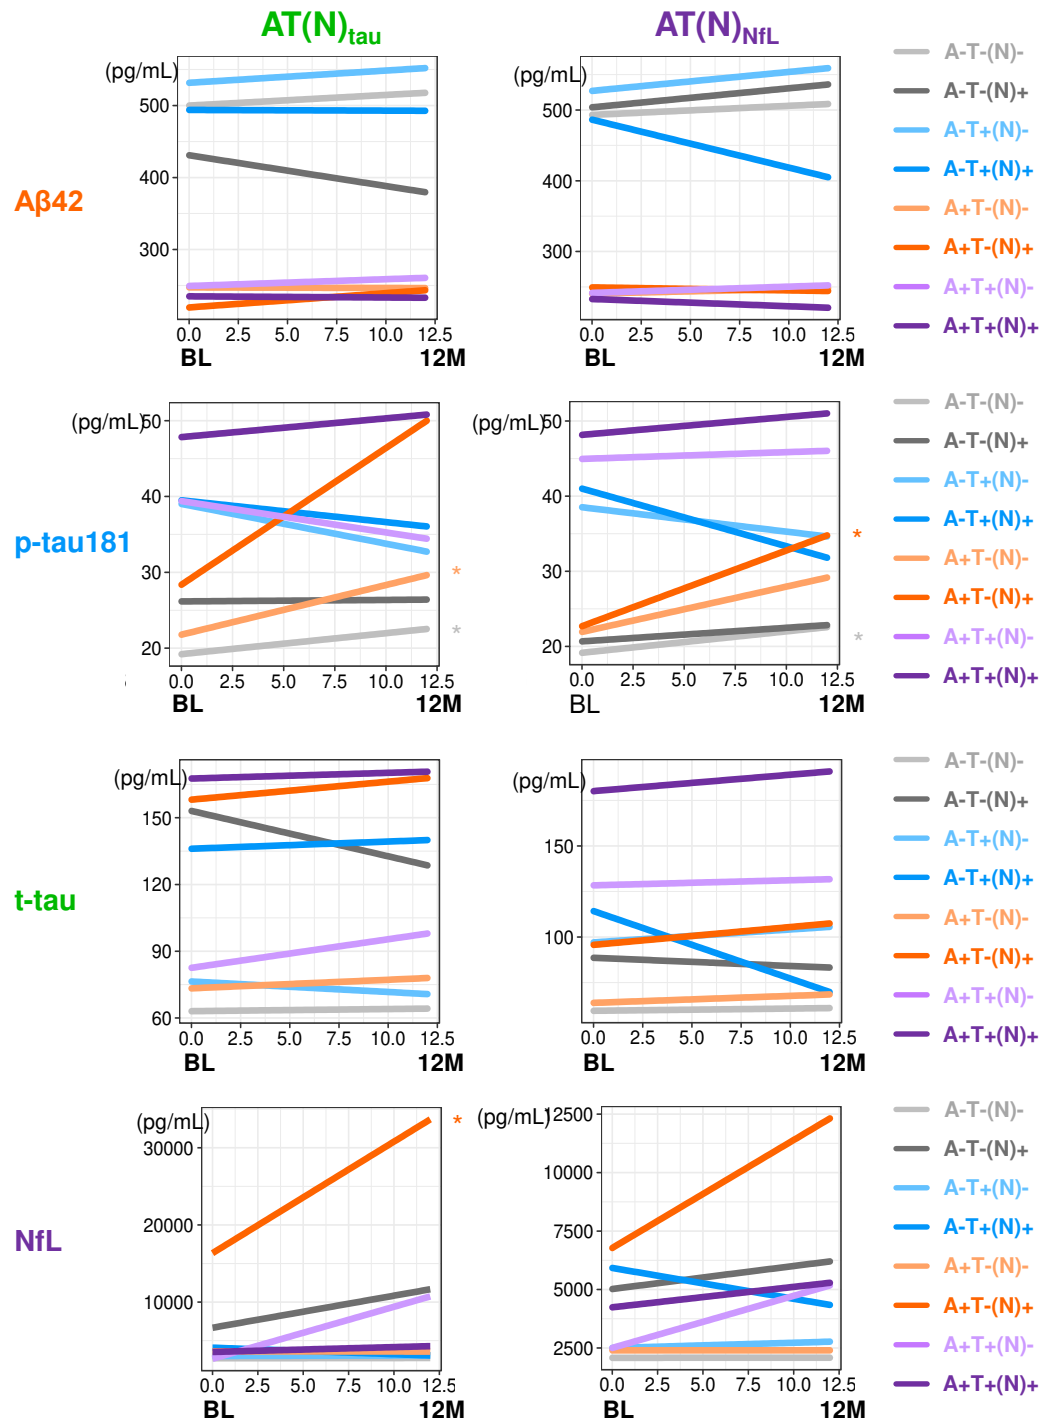



**Supplementary Figure 7. Longitudinal changes of CSF biomarkers in 8 AT(N) profiles**

Linear regression model adjusted for age, sex, and education years predicts the changes of each CSF biomarker over time among participants classified into eight AT(N) categories classified into AT(N)<sub>tau</sub> (upper panel) and AT(N)<sub>NfL</sub> (lower panel). Asterisk shows a significant change of slope relative to zero.
